# Supplementary material
Source: ML conference proceedings conference paper supplement (https://proceedings.neurips.cc/paper_files/paper/2022/hash/efb02f96766a3b599c76852abf4d42dd-Abstract.html)
Supplement: Supplementary file 1 [file efb02f96766a3b599c76852abf4d42dd-Supplemental-Conference.pdf]

---

# Polyhistor: Parameter-Efficient Multi-Task Adaptation for Dense Vision Tasks Appendix

---

## 1 Additional analyses

### 1.1 Feature backbones with different pretraining data.

**Comparison to baselines.** We also experiment with other baseline methods on SwinTransformer-Base pretrained on ImageNet-1k and ImageNet-22k. As shown in Table 1 and 2, we find that the trend of all methods are similar to the results on SwinTransformer-Tiny. Specifically, most baseline methods have a performance gap with Hyperformer and our *Polyhistor-Lite*. Compared to Hyperformer, our *Polyhistor-Lite* use less than 5% of their trainable parameters in the encoder to achieve similar or even better results. By tuning the adapter down-projection ratio and using fewer trainable parameters, our *Polyhistor-Lite* still obtains a higher performance gain against the baseline methods with low trainable parameters (e.g., Compacter++, Bitfit, VPT, PHM layer, LoRA, Adapter). These results show that our proposed *Polyhistor-Lite* can derive a better trade-off against all existing parameter-efficient works in different pretrained feature backbones.

### 1.2 Ranks of hyper-network output.

Another important hyper-parameter in our model is ranks of hyper-network outputs. We thus experiment *Polyhistor* and vary the rank of output matrices, and, as shown in Table 3, we find the model can derive a better results with a large rank.

### 1.3 Experiment results of tuning baseline methods.

In Fig. 3b of the main paper, we presented the results of different baseline methods with different hyper-parameters. For a clearer comparison between baseline methods, We also provide the exact values of all results in Table 4. It is worth noting that simply tuning the baseline methods only leads to limited improvements of baseline methods, and our proposed *Polyhistor* and *Polyhistor-Lite* still achieve a better trade-off between performance gain and trainable parameters.

### 1.4 Experiment results of other hierarchical vision transformers.

As shown in Table 5, we further apply our method and other baseline methods to the Pyramid Vision Transformer [9]. We find our Polyhistor can achieve comparable results to Hyperformer while using much fewer trainable parameters. Polyhistor-Lite can further reduce trainable parameters and achieves higher accuracy than all other methods using a similar amount of trainable parameters (e.g., BitFit, PHM layer, Compacter, LoRA, and Low-rank Adapter). This trend is aligned with what we found in Swin Transformer. We show that our method generalizes to different backbones.

Table 1: Experimental results on Multi-Task Adaptation. We use SwinTransformer-Base pretrained on **ImageNet-1k** as the feature backbone.  $\Delta_{up}$  represents relative improvement or gap to the Single-task Full Fine-tuning. Results with the symbol  $\uparrow / \downarrow$  indicate higher/lower is better.  $\rho$  represents the down-projection ratio of adapters (*i.e.*, the ratio of adapter input  $d$  to hidden vectors  $n$ ,  $\rho = d/n$ ).

|                                             | Number of Trainable Parameters<br>Encoder/All | Performance of Each Downstream Task |                   |                 |                      | Averaged Results |
|---------------------------------------------|-----------------------------------------------|-------------------------------------|-------------------|-----------------|----------------------|------------------|
|                                             |                                               | Seg. $\uparrow$                     | H.Part $\uparrow$ | Sal. $\uparrow$ | Normals $\downarrow$ | $\Delta_{up}$    |
| Single-task Full Fine-tuning                | 346.96 / 350.01                               | 67.88                               | 64.47             | 61.26           | 18.85                | 0.00%            |
| Fine-tuning Decoders                        | 0.00 / 3.04                                   | 68.98                               | 55.57             | 58.37           | 21.36                | -7.55%           |
| Bitfit [1]                                  | 0.20 / 3.24                                   | 71.93                               | 59.12             | 60.67           | 20.08                | -2.46%           |
| Relative bias [2]                           | 0.06 / 3.11                                   | 68.44                               | 55.70             | 57.27           | 21.63                | -8.51%           |
| VPT-deep [3]                                | 2.41 / 5.45                                   | 68.80                               | 55.85             | 58.25           | 21.37                | -7.57%           |
| PHM layer [4]                               | 1.89 / 4.94                                   | 71.93                               | 59.11             | 59.71           | 20.35                | -3.21%           |
| Compacter++ [4]                             | 0.25 / 3.29                                   | 72.00                               | 59.11             | 59.73           | 20.41                | -3.25%           |
| LoRA [5]                                    | 0.87 / 4.31                                   | 74.10                               | 61.57             | 63.87           | 18.55                | 2.63%            |
| Adapter [6]                                 | 3.64 / 6.68                                   | 73.29                               | 60.30             | 62.42           | 18.66                | 1.10%            |
| Low-rank adapter                            | 0.34 / 2.89                                   | 72.13                               | 59.10             | 59.81           | 20.28                | -3.01%           |
| Hyperformer [7]                             | <b>60.88 / 63.92</b>                          | <b>73.60</b>                        | <b>63.82</b>      | <b>67.31</b>    | <b>16.90</b>         | <b>6.91%</b>     |
| <i>Polyhistor-Lite</i> (Ours; $\rho = 1$ )  | 1.29 / 4.34                                   | <b>73.70</b>                        | <b>63.32</b>      | <b>66.50</b>    | <b>16.93</b>         | <b>6.38%</b>     |
| <i>Polyhistor-Lite</i> (Ours; $\rho = 2$ )  | 0.62 / 3.67                                   | <b>73.69</b>                        | <b>63.04</b>      | <b>66.56</b>    | <b>17.30</b>         | <b>5.80%</b>     |
| <i>Polyhistor-Lite</i> (Ours; $\rho = 4$ )  | 0.39 / 3.43                                   | <b>73.57</b>                        | <b>62.04</b>      | <b>65.84</b>    | <b>17.70</b>         | <b>4.55%</b>     |
| <i>Polyhistor-Lite</i> (Ours; $\rho = 8$ )  | 0.29 / 3.34                                   | <b>73.92</b>                        | <b>62.15</b>      | <b>65.37</b>    | <b>17.70</b>         | <b>4.53%</b>     |
| <i>Polyhistor-Lite</i> (Ours; $\rho = 32$ ) | 0.24 / 3.28                                   | <b>73.80</b>                        | <b>61.32</b>      | <b>64.64</b>    | <b>17.92</b>         | <b>3.57%</b>     |

Table 2: Experimental results on Multi-Task Adaptation. We use SwinTransformer-Base pretrained on **ImageNet-22k** as the feature backbone.  $\Delta_{up}$  represents relative improvement or gap to the Single-task Full Fine-tuning. Results with the symbol  $\uparrow / \downarrow$  indicate higher/lower is better.  $\rho$  represents the down-projection ratio of adapters (*i.e.*, the ratio of adapter input  $d$  to hidden vectors  $n$ ,  $\rho = d/n$ ).

|                                             | Number of Trainable Parameters<br>Encoder/All | Performance of Each Downstream Task |                   |                 |                      | Averaged Results |
|---------------------------------------------|-----------------------------------------------|-------------------------------------|-------------------|-----------------|----------------------|------------------|
|                                             |                                               | Seg. $\uparrow$                     | H.Part $\uparrow$ | Sal. $\uparrow$ | Normals $\downarrow$ | $\Delta_{up}$    |
| Single-task Full Fine-tuning                | 346.96 / 350.01                               | 70.72                               | 67.47             | 61.00           | 18.73                | 0.00%            |
| Fine-tuning Decoders                        | 0.00 / 3.04                                   | 73.33                               | 60.56             | 59.13           | 21.38                | -5.94%           |
| Bitfit [1]                                  | 0.20 / 3.24                                   | 76.42                               | 64.89             | 62.05           | 19.03                | 1.09%            |
| Relative bias [2]                           | 0.06 / 3.11                                   | 72.86                               | 60.64             | 58.44           | 21.51                | -6.53%           |
| VPT-deep [3]                                | 2.41 / 5.45                                   | 74.21                               | 61.41             | 58.80           | 21.61                | -5.90%           |
| PHM layer [4]                               | 1.89 / 4.94                                   | 76.33                               | 64.59             | 60.43           | 20.23                | -1.32%           |
| Compacter++ [4]                             | 0.25 / 3.29                                   | 75.99                               | 64.65             | 60.42           | 20.01                | -1.13%           |
| LoRA [5]                                    | 0.87 / 4.31                                   | 78.24                               | 66.95             | 64.70           | 18.07                | 4.86%            |
| Adapter [6]                                 | 3.64 / 6.68                                   | 77.22                               | 65.95             | 63.80           | 18.38                | 3.35%            |
| Low-rank adapter                            | 0.34 / 2.89                                   | 75.65                               | 64.75             | 60.50           | 20.03                | -1.21%           |
| Hyperformer [7]                             | <b>60.88 / 63.92</b>                          | <b>78.41</b>                        | <b>68.94</b>      | <b>67.50</b>    | <b>16.80</b>         | <b>6.91%</b>     |
| <i>Polyhistor-Lite</i> (Ours; $\rho = 1$ )  | 1.29 / 4.34                                   | <b>77.91</b>                        | <b>68.02</b>      | <b>66.89</b>    | <b>16.54</b>         | <b>8.08%</b>     |
| <i>Polyhistor-Lite</i> (Ours; $\rho = 32$ ) | 0.24 / 3.28                                   | <b>77.74</b>                        | <b>66.33</b>      | <b>65.03</b>    | <b>17.65</b>         | <b>5.15%</b>     |

## 1.5 Experiment results of self-supervised models.

We conduct an experiment using the self-supervised Swin Transformer-Tiny (MoBY-Tiny [10]), and, for a fair comparison, we also run all baseline with MoBY-Tiny and report the results in the Table 6. We find our proposed method can achieve similar or even better results compared to the Hyperformer [2] while using much less trainable parameters.

## 1.6 Discussion on difference to Visual Prompt Tuning [3]

We summarize the difference between Visual Prompt Tuning and our method in the following points.

**Different Problem Settings:** Visual Prompt Tuning focuses on single-task parameter-efficient adaptation, while our proposed method focuses on multi-task parameter-efficient adaptation. Our goal is to perform a parameter-efficient adaptation for multiple tasks and share the beneficial information across multiple vision tasks.

Table 3: Ablation study on the sizes of ranks in hypernetwork output matrices. We vary the dimensions of ranks  $r$  from 1 to  $\frac{n}{2}$  on our *Polyhistor*. Note that  $n$  is the dimension of hidden vectors in adapters. All results in this table are based on SwinTransformer-Tiny pretrained on ImageNet-1k.

|                              | Dimension of Ranks $r$ | Num. of Trainable Parameters Encoder/ All | Performance of Each Downstream Task |                   |                 |                      | Averaged Results $\Delta_{up}$ |
|------------------------------|------------------------|-------------------------------------------|-------------------------------------|-------------------|-----------------|----------------------|--------------------------------|
|                              |                        |                                           | Seg. $\uparrow$                     | H.Seg. $\uparrow$ | Sal. $\uparrow$ | Normals $\downarrow$ |                                |
| Single-task Full Fine-tuning | -                      | 110.07 / 112.62                           | 67.21                               | 61.93             | 62.35           | 17.97                | 0.00%                          |
| <i>Polyhistor</i>            | 1                      | 2.38 / 4.93                               | 70.31                               | 58.61             | 64.14           | 17.98                | 0.52%                          |
| <i>Polyhistor</i>            | n/8                    | 4.08 / 6.63                               | 71.18                               | 59.52             | 65.04           | 17.81                | 1.70%                          |
| <i>Polyhistor</i>            | n/4                    | 6.41 / 8.96                               | 70.87                               | 59.54             | 65.47           | 17.47                | 2.34%                          |
| <i>Polyhistor</i>            | n/2                    | 11.08 / 13.63                             | 71.31                               | 60.15             | 65.46           | 17.40                | 2.84%                          |

Table 4: Limited improvements from tuning hyper-parameters on baseline method.  $\Delta_{up}$  represents relative improvement or gap to the Single-task Full Fine-tuning. Results with the symbol  $\uparrow / \downarrow$  indicate higher/lower is better. Results with the symbol  $\uparrow / \downarrow$  indicate higher/lower is better.  $\rho$  represents the down-projection ratio of adapters (*i.e.*, the ratio of adapter input  $d$  to hidden vectors  $n$ ,  $\rho = d/n$ ).

|                                   | Num. of Trainable Parameters Encoder / All | Performance of Each Downstream Task |                   |                 |                      | Averaged Results $\Delta_{up}$ |
|-----------------------------------|--------------------------------------------|-------------------------------------|-------------------|-----------------|----------------------|--------------------------------|
|                                   |                                            | Seg. $\uparrow$                     | H.Seg. $\uparrow$ | Sal. $\uparrow$ | Normals $\downarrow$ |                                |
| Single-task Full Fine-tuning      | 110.07 / 112.62                            | 67.21                               | 61.93             | 62.35           | 17.97                | 0.00%                          |
| Fine-tuning Decoders              | 0.00 / 2.55                                | 63.14                               | 52.37             | 58.39           | 20.89                | -11.02%                        |
| Compacter++ ( $\rho = 1$ ) [4]    | 0.14 / 2.69                                | 67.33                               | 55.68             | 59.50           | 19.66                | -5.98%                         |
| Compacter++ ( $\rho = 2$ ) [4]    | 0.11 / 2.66                                | 67.26                               | 55.69             | 59.47           | 19.54                | -5.84%                         |
| Compacter++ ( $\rho = 8$ ) [4]    | 0.09 / 2.64                                | 67.19                               | 55.85             | 59.48           | 19.56                | -5.96%                         |
| Compacter ( $\rho = 1$ ) [4]      | 0.28 / 2.83                                | 67.94                               | 56.23             | 60.18           | 19.25                | -4.69%                         |
| Compacter ( $\rho = 2$ ) [4]      | 0.23 / 2.78                                | 68.08                               | 56.41             | 60.08           | 19.22                | -4.55%                         |
| Compacter ( $\rho = 8$ ) [4]      | 0.19 / 2.74                                | 68.15                               | 56.16             | 60.12           | 19.37                | -4.83%                         |
| Adapter ( $\rho = 1$ ) [6]        | 17.32 / 19.87                              | 69.13                               | 57.35             | 61.17           | 18.79                | -2.75%                         |
| Adapter ( $\rho = 2$ ) [6]        | 8.69 / 11.24                               | 69.21                               | 57.38             | 61.28           | 18.83                | -2.71%                         |
| Adapter ( $\rho = 4$ ) [6]        | 4.37 / 6.92                                | 68.93                               | 57.33             | 61.24           | 18.95                | -3.03%                         |
| Adapter ( $\rho = 8$ ) [6]        | 2.21 / 4.76                                | 69.04                               | 57.34             | 61.25           | 18.86                | -2.86%                         |
| Adapter ( $\rho = 16$ ) [6]       | 1.13 / 3.68                                | 69.03                               | 57.22             | 61.17           | 18.91                | -3.01%                         |
| Shared Adapter ( $\rho = 1$ ) [8] | 4.35 / 6.89                                | 70.57                               | 59.43             | 62.54           | 19.07                | -1.21%                         |
| Shared Adapter ( $\rho = 2$ ) [8] | 2.20 / 4.74                                | 70.21                               | 59.15             | 62.29           | 19.26                | -1.83%                         |
| Shared Adapter ( $\rho = 4$ ) [8] | 1.12 / 3.66                                | 70.02                               | 58.87             | 62.09           | 19.35                | -2.22%                         |
| Shared Adapter ( $\rho = 8$ ) [8] | 0.58 / 3.12                                | 69.63                               | 58.54             | 61.74           | 19.61                | -2.99%                         |
| Hyperformer ( $\rho = 8$ ) [7]    | 72.77 / 75.32                              | 71.43                               | 60.73             | 65.54           | 17.77                | 2.64%                          |
| Hyperformer ( $\rho = 16$ ) [7]   | 37.69 / 40.24                              | 71.28                               | 60.19             | 65.82           | 17.89                | 2.31%                          |
| Hyperformer ( $\rho = 32$ ) [7]   | 20.15 / 22.70                              | 71.12                               | 59.71             | 64.41           | 19.06                | -0.14%                         |
| <i>Polyhistor(Ours)</i>           | 6.41 / 8.96                                | 70.87                               | 59.54             | 65.47           | 17.47                | 2.34%                          |
| <i>Polyhistor-Lite(Ours)</i>      | 0.41 / 2.96                                | 70.24                               | 59.12             | 64.75           | 17.40                | 1.74%                          |

**Different types of parameter-efficient methods:** Visual Prompt Tuning adds learnable parameters along with the visual embeddings, while our proposed method utilizes a shared hyper-network to produce the adapter weights for different tasks. Also, the insertion locations of learnable parameters are different (VPT: input space, Ours: parallel to fully-connected layers).

## 2 Implementation Details

For a fair comparison between different methods, we use batch size 12 and train for 60 epochs for each task. We use Adam optimizer [11] with the learning rate  $1e - 4$  and the weight decay  $1e - 4$ , and the learning rate is linearly decreased with respect to the training iteration.

We followed the prior multi-tasking learning work [12] to use task-wise weighting on different losses, while we found that using the uniform weights on the losses has similar results as the task-wise weighting. We also applied the same data augmentations, RandomHorizontalFlip, RandomScale

Table 5: Experimental results on Multi-Task Adaptation. We use Pyramid Vision Transformer-Small as the feature backbone.  $\Delta_{up}$  represents relative improvement or gap to the Single-task Full Fine-tuning. Results with the symbol  $\uparrow / \downarrow$  indicate higher/lower is better.  $\rho$  represents the down-projection ratio of adapters (*i.e.*, the ratio of adapter input  $d$  to hidden vectors  $n$ ,  $\rho = d/n$ ).

|                                             | Number of Trainable Parameters<br>Encoder/All | Performance of Each Downstream Task |                   |                 |                      | Averaged Results |
|---------------------------------------------|-----------------------------------------------|-------------------------------------|-------------------|-----------------|----------------------|------------------|
|                                             |                                               | Seg. $\uparrow$                     | H.Part $\uparrow$ | Sal. $\uparrow$ | Normals $\downarrow$ | $\Delta_{up}$    |
| Single-task Full Fine-tuning                | 95.88 / 97.99                                 | 68.81                               | 61.27             | 62.67           | 17.55                | 0.00%            |
| Fine-tuning Decoders                        | 0.00 / 2.11                                   | 64.86                               | 51.18             | 61.54           | 19.55                | -8.85%           |
| Bitfit [1]                                  | 0.22 / 2.34                                   | 71.41                               | 55.71             | 64.08           | 18.69                | -2.38%           |
| Adapter [6]                                 | 0.79 / 2.90                                   | 71.94                               | 56.38             | 64.16           | 18.75                | -1.97%           |
| LoRA [5]                                    | 0.30 / 2.41                                   | 71.89                               | 56.90             | 64.27           | 18.48                | -1.35%           |
| Low-rank adapter                            | 0.25 / 2.36                                   | 70.72                               | 55.34             | 63.39           | 18.70                | -3.08%           |
| PHM layer [4]                               | 0.42 / 2.53                                   | 70.81                               | 55.02             | 63.51           | 18.75                | -3.20%           |
| Compacter++ [4]                             | 0.09 / 2.20                                   | 70.29                               | 54.80             | 63.16           | 18.82                | -3.71%           |
| Hyperformer [7]                             | <b>14.03 / 16.14</b>                          | <b>70.81</b>                        | <b>57.76</b>      | <b>65.49</b>    | <b>17.75</b>         | <b>0.14%</b>     |
| <i>Polyhistor-Lite</i> (Ours; $\rho = 1$ )  | 5.21 / 7.32                                   | <b>71.00</b>                        | <b>57.52</b>      | <b>65.83</b>    | <b>17.83</b>         | <b>0.13%</b>     |
| <i>Polyhistor-Lite</i> (Ours; $\rho = 32$ ) | 0.29 / 2.40                                   | <b>70.93</b>                        | <b>56.71</b>      | <b>65.00</b>    | <b>17.95</b>         | <b>-0.73%</b>    |

Table 6: Experimental results on Multi-Task Adaptation. We use MoBY-Tiny [10] as the feature backbone.  $\Delta_{up}$  represents relative improvement or gap to the Single-task Full Fine-tuning. Results with the symbol  $\uparrow / \downarrow$  indicate higher/lower is better.  $\rho$  represents the down-projection ratio of adapters (*i.e.*, the ratio of adapter input  $d$  to hidden vectors  $n$ ,  $\rho = d/n$ ).

|                               | Number of Trainable Parameters<br>Encoder/All | Performance of Each Downstream Task |                   |                 |                      | Averaged Results |
|-------------------------------|-----------------------------------------------|-------------------------------------|-------------------|-----------------|----------------------|------------------|
|                               |                                               | Seg. $\uparrow$                     | H.Part $\uparrow$ | Sal. $\uparrow$ | Normals $\downarrow$ | $\Delta_{up}$    |
| Single-task Full Fine-tuning  | 110.07 / 112.62                               | 65.52                               | 61.78             | 62.05           | 18.14                | 0.00%            |
| Fine-tuning Decoders          | 0.00 / 2.55                                   | 59.64                               | 52.97             | 59.60           | 19.88                | -9.21%           |
| Bitfit [1]                    | 0.30 / 2.85                                   | 63.43                               | 54.90             | 59.50           | 19.80                | -6.90%           |
| VPT-shallow [3]               | 0.02 / 2.57                                   | 59.50                               | 52.84             | 59.48           | 19.88                | -9.36%           |
| VPT-deep [3]                  | 0.88 / 3.43                                   | 56.15                               | 50.30             | 57.22           | 20.71                | -13.72%          |
| Adapter [6]                   | 8.69 / 11.24                                  | 65.00                               | 56.66             | 60.84           | 18.64                | -3.45%           |
| LoRA [5]                      | 0.32 / 2.87                                   | 65.64                               | 57.66             | 62.29           | 18.47                | -1.99%           |
| Low-rank adapter              | 0.34 / 2.89                                   | 63.30                               | 55.24             | 59.72           | 19.14                | -5.82%           |
| PHM layer [4]                 | 0.59 / 3.14                                   | 63.21                               | 54.99             | 59.70           | 19.13                | -5.95%           |
| Compacter++ [4]               | 0.11 / 2.66                                   | 62.31                               | 54.69             | 59.43           | 19.58                | -7.14%           |
| Hyperformer [7]               | <b>19.29 / 44.25</b>                          | <b>66.50</b>                        | <b>58.97</b>      | <b>66.02</b>    | <b>17.61</b>         | <b>1.56%</b>     |
| <i>Polyhistor</i> (Ours)      | 6.41 / 8.96                                   | <b>67.69</b>                        | <b>59.32</b>      | <b>65.15</b>    | <b>17.43</b>         | <b>2.05%</b>     |
| <i>Polyhistor-Lite</i> (Ours) | 0.41 / 2.96                                   | <b>67.23</b>                        | <b>58.90</b>      | <b>64.62</b>    | <b>17.72</b>         | <b>1.09%</b>     |

with the range  $[0.75, 1.25]$ , RandomRotate with the range  $[-20, 20]$ , and Resize to  $(512, 512)$ , which are used in the prior work [12].

For the hyper-parameters of *Polyhistor*, we set the input dimension of adapter  $d$  as the dimension of hidden vectors in SwinTransformers, and the down-projection ratio is set as  $\rho = d/n = 16$ . For the low-rank output matrix of hyper-networks, we set the rank as  $n/4$ , where  $n$  is bottleneck size. We set the size of task embeddings as 64.

As for the hyper-parameters of *Polyhistor-Lite*, we also set the input dimension of adapter  $d$  as the dimension of hidden vectors in SwinTransformers, and the down-projection ratio is set as  $\rho = d/n = 2$ . For the low-rank output matrix of hyper-networks, we set the rank as  $n/4$ , where  $n$  is bottleneck size. We set the size of task embeddings as 64.

## References

- [1] Elad Ben Zaken, Shauli Ravfogel, and Yoav Goldberg. Bitfit: Simple parameter-efficient fine-tuning for transformer-based masked language-models. In *Proceedings of the 60th Annual Meeting of the Association for Computational Linguistics (ACL)*, 2022.
- [2] Ze Liu, Yutong Lin, Yue Cao, Han Hu, Yixuan Wei, Zheng Zhang, Stephen Lin, and Baining Guo. Swin transformer: Hierarchical vision transformer using shifted windows. In *Proceedings of the IEEE International Conference on Computer Vision (ICCV)*, 2021.
- [3] Menglin Jia, Luming Tang, Bor-Chun Chen, Claire Cardie, Serge Belongie, Bharath Hariharan, and Ser-Nam Lim. Visual prompt tuning. *arXiv preprint arXiv:2203.12119*, 2022.
- [4] Rabeeh Karimi mahabadi, James Henderson, and Sebastian Ruder. Compacter: Efficient low-rank hypercomplex adapter layers. In *Advances in Neural Information Processing Systems (NeurIPS)*, 2021.
- [5] Edward Hu, Yelong Shen, Phil Wallis, Zeyuan Allen-Zhu, Yuanzhi Li, Lu Wang, and Weizhu Chen. Lora: Low-rank adaptation of large language models. In *International Conference on Learning Representations*, 2022.
- [6] Junxian He, Chunting Zhou, Xuezhe Ma, Taylor Berg-Kirkpatrick, and Graham Neubig. Towards a unified view of parameter-efficient transfer learning. In *Proceedings of the International Conference on Learning Representations (ICLR)*, 2022.
- [7] Rabeeh Karimi Mahabadi, Sebastian Ruder, Mostafa Dehghani, and James Henderson. Parameter-efficient multi-task fine-tuning for transformers via shared hypernetworks. In *Annual Meeting of the Association for Computational Linguistics*, 2021.
- [8] Mohit Bansal Yi-Lin Sung, Jaemin Cho. Vi-adapter: Parameter-efficient transfer learning for vision-and-language tasks. In *Proceedings of the IEEE Conference on Computer Vision and Pattern Recognition (CVPR)*, 2022.
- [9] Wenhai Wang, Enze Xie, Xiang Li, Deng-Ping Fan, Kaitao Song, Ding Liang, Tong Lu, Ping Luo, and Ling Shao. Pyramid vision transformer: A versatile backbone for dense prediction without convolutions. In *Proceedings of the IEEE International Conference on Computer Vision (ICCV)*, 2021.
- [10] Zhenda Xie, Yutong Lin, Zhuliang Yao, Zheng Zhang, Qi Dai, Yue Cao, and Han Hu. Self-supervised learning with swin transformers. *arXiv preprint arXiv:2105.04553*, 2021.
- [11] Diederik P Kingma and Jimmy Ba. Adam: A method for stochastic optimization. *arXiv preprint arXiv:1412.6980*, 2014.
- [12] S. Vandenhende, S. Georgoulis, W. Van Gansbeke, M. Proesmans, D. Dai, and L. Van Gool. Multi-task learning for dense prediction tasks: A survey. *IEEE Transactions on Pattern Analysis and Machine Intelligence*, 2021.
